# Supplementary material
Source: MDPI journal article supplement (https://www.mdpi.com/1424-2818/14/10/879)
Supplement: s1 [file s1]

#### File S1. Supplementary Methods

We searched the literature using Web of Science (July 2021) for articles which reported on a restoration project or research that included any metric of amphibian success. We included multiple terms for geographically isolated wetlands. Our final search string was 'Restoration AND (frog OR salamander OR amphibian OR anuran OR urodel) AND ("geographically isolated" OR "ephemeral" OR "vernal pool" OR "temporary wetland" OR "isolated wetland" OR "seasonal wetland" OR "playa" OR "Carolina bay" OR "prairie pothole" OR "limesink")'. Following this initial search and review of articles for relevance, we repeated our search within selected journals (Restoration Ecology, Freshwater Biology, Ecological Applications, Ecosphere, Hydrological Processes, Wetlands Ecology and Management; December 2021). In recognition of the diverse terms for geographically isolated wetlands and the dispersed nature of the literature, for each included article we reviewed the citations to identify any additional relevant literature. Using this process, we identified 30 articles which met our search criteria. We also included 1 unpublished account because it was cited in published literature. An additional reference was provided by a reviewer. The final list of included studies is given in Supplementary Table S1.

Table S1. List of published (n = 31) and unpublished (n = 1) accounts of restoration outcomes for amphibians in geographically isolated wetlands considered in this review. \*Articles which did not list restoration methods.

| Citation                                                                                                                                                                                                                                             | Citation Number in Text | Research location                           | Habitat/Wetland Type                                                                 | Time-frame       | Amphibian success metric                     |
|------------------------------------------------------------------------------------------------------------------------------------------------------------------------------------------------------------------------------------------------------|-------------------------|---------------------------------------------|--------------------------------------------------------------------------------------|------------------|----------------------------------------------|
| Balas, C. J.; Euliss Jr., N. H.; Mushet, D. M. Influence of Conservation Programs on Amphibians Using Seasonal Wetlands in the Prairie Pothole Region. <i>Wetlands</i> <b>2012</b> , 32, 333–345.                                                    | 54                      | Prairie pothole region of North America     | prairie potholes                                                                     | 10 + years       | occupancy                                    |
| Beas, B. J.; Smith, L. M. Amphibian Community Responses to Playa Restoration in the Rainwater Basin. <i>Wetlands</i> <b>2014</b> , 34 (6), 1247–1253.                                                                                                | 59                      | Rainwater Basin, Nebraska                   | playas in natural grassland and croplands                                            | 2 – 11 years     | species richness                             |
| Beebee, T. J. C. Changes in Dewpond Numbers and Amphibian Diversity over 20 Years on Chalk Downland in Sussex, England. <i>Biol. Conserv.</i> <b>1997</b> , 81 (3), 215–219.                                                                         | 62                      | Chalk hills, Sussex Downs, southern England | dewponds, artificial but created in 17th century                                     | unclear          | presence                                     |
| Chandler, H. C.; Colon-Gaud, J. C.; Gorman, T. A.; Carson, K.; Haas, C. A. Does Long-Term Fire Suppression Impact Leaf Litter Breakdown and Aquatic Invertebrate Colonization in Pine Flatwoods Wetlands? <i>PeerJ</i> <b>2021</b> , 9.              | 98                      | Eglin Air Force Base, Florida, USA          | ephemeral wetlands, pine uplands                                                     | unclear/on-going | prey abundance                               |
| Cooke, A. S. Monitoring a Breeding Population of Crested Newts ( <i>Triturus Cristatus</i> ) in a Housing Development. <i>Herpetol. J.</i> <b>1997</b> , 7 (2), 37–42.                                                                               | 64                      | Stanground, England                         | ponds, possibly created but unknown; former pasture converted to housing development | 9 years          | abundance                                    |
| Denton, J. S.; Hitchings, S. P.; Beebee, T. J. C.; Gent, A. A Recovery Program for the Natterjack Toad ( <i>Bufo Calamita</i> ) in Britain. <i>Conserv. Biol.</i> <b>1997</b> , 11 (6), 1329–1338.                                                   | 48                      | Heaths and dunes, England, Scotland, Wales  | ephemeral wetlands; dunes, heath and salt marsh surrounds                            | 3 years          | occupancy, population size                   |
| Gorman, T. A.; Haas, C. A.; Himes, J. G. Evaluating Methods to Restore Amphibian Habitat in Fire-Suppressed Pine Flatwoods Wetlands. <i>Fire Ecol.</i> <b>2013</b> , 9 (1), 96–109.                                                                  | 83                      | Eglin Air Force Base, Florida, USA          | ephemeral wetlands, pine uplands                                                     | 2 years          | species richness                             |
| Green, A. W.; Hooten, M. B.; Grant, E. H. C.; Bailey, L. L.; Cadotte, M. Evaluating Breeding and Metamorph Occupancy and Vernal Pool Management Effects for Wood Frogs Using a Hierarchical Model. <i>J. Appl. Ecol.</i> <b>2013</b> , 50 (5), 1116. | 63                      | Patuxent Research Refuge, Maryland, USA     | vernal pools, deciduous forest uplands                                               | 1 year           | breeding, metamorph production probabilities |

|                                                                                                                                                                                                                                                                                                          |    |                                                                  |                                                                            |                             |                                                                                   |
|----------------------------------------------------------------------------------------------------------------------------------------------------------------------------------------------------------------------------------------------------------------------------------------------------------|----|------------------------------------------------------------------|----------------------------------------------------------------------------|-----------------------------|-----------------------------------------------------------------------------------|
| Hanlin, H. G.; Martin, F. D.; Wike, L. D.; Bennett, S. H. Terrestrial Activity, Abundance and Species Richness of Amphibians in Managed Forests in South Carolina. <i>Am. Midl. Nat.</i> <b>2000</b> , 143 (1), 70–83.                                                                                   | 85 | Lost Lake, Savannah River Site, South Carolina, USA              | Carolina Bay, 3 upland forest types (loblolly, slash, mixed hardwood)      | 3 – 6 years                 | species diversity, evenness                                                       |
| Klaus, J. M.; Noss, R. F. Specialist and Generalist Amphibians Respond to Wetland Restoration Treatments. <i>J. Wildl. Manage.</i> <b>2016</b> , 80 (6), 1106–1119.                                                                                                                                      | 84 | Francis Marion National Forest, South Carolina, USA              | geographically isolated wetlands, longleaf pine uplands                    | 5 years                     | abundance by species, relative abundance, richness of specialists vs. generalists |
| Means, R. C.; Means, R. P. M.; Beshel, M.; Mendyk, R.; Hill, P.; Hoffman, M.; Reichling, S.; Summerford, B. A Conservation Strategy for the Imperiled Striped Newt ( <i>Notophthalmus Perstriatus</i> ) in the Apalachicola National Forest, Florida, Seventh Annual Report. <b>2017</b> , No. December. | 49 | Apalachicola National Forest, Florida, USA                       | geographically isolated wetlands, longleaf pine uplands                    | 5 years                     | breeding, metamorph presence                                                      |
| Mitchell, J. C. Restored Wetlands in Mid-Atlantic Agricultural Landscapes Enhance Species Richness of Amphibian Assemblages. <i>Journal of Fish and Wildlife Management</i> <b>2016</b> 7 (2), 490–498.                                                                                                  | *  | Mid-Atlantic (Delaware, Maryland, Virginia, North Carolina), USA | ephemeral wetlands                                                         | unknown                     | richness, relative abundance                                                      |
| Mullin, S. J.; Towey, J. B.; Szafoni, R. E. Using Rotenone™ to Enhance Native Amphibian Breeding Habitat in Ponds (Illinois). <i>Ecol. Restor.</i> <b>2004</b> , 22 (4), 305–306.                                                                                                                        | 99 | Illinois, USA                                                    | Minimal description: "in ravines", "small, shallow", Pond D semi-permanent | 2 years                     | abundance                                                                         |
| Mushet, D. M.; Euliss Jr., N. H.; Stockwell, C. A. Mapping Anuran Habitat Suitability to Estimate Effects of Grassland and Wetland Conservation Programs. <i>Copeia</i> <b>2012</b> , 2012, 322–331.                                                                                                     | 86 | Northern Great Plains, North Dakota, USA                         | grasslands, cropland                                                       | Unknown, expiring easements | habitat suitability                                                               |
| Nyberg, D.; Lerner, I. Revitalization of Ephemeral Pools as Frog Breeding Habitat in an Illinois Forest Preserve. <i>J. Iowa Acad. Sci. IJAS</i> <b>2000</b> , 107 (3–4), 187.                                                                                                                           | 55 | Illinois, USA                                                    | permanent and ephemeral wetlands, oak dominated forests                    | 2 – 4 years                 | Presence of calling                                                               |
| Petranka, J. W.; Harp, E. M.; Holbrook, C. T.; Hamel, J. A. Long-Term Persistence of Amphibian Populations in a Restored Wetland Complex. <i>Biol. Conserv.</i> <b>2007</b> , 138 (3–4), 371–380.                                                                                                        | 51 | Tulula Wetlands Mitigation Bank, North Carolina, USA             | wetland complex with ephemeral to permanent ponds                          | 13 years                    | egg mass counts for focal species, juvenile production                            |

|                                                                                                                                                                                                                      |     |                                                                                                                                            |                                                                         |                                            |                                                   |
|----------------------------------------------------------------------------------------------------------------------------------------------------------------------------------------------------------------------|-----|--------------------------------------------------------------------------------------------------------------------------------------------|-------------------------------------------------------------------------|--------------------------------------------|---------------------------------------------------|
| Petranka, J. W.; Murray, S. S.; Kennedy, C. A. Responses of Amphibians to Restoration of a Southern Appalachian: Perturbations Confound Post-Restoration Assessment. <i>Wetlands</i> <b>2003</b> , 23 (2), 278–290.  | 32  | Tulula Wetlands Mitigation Bank, North Carolina, USA                                                                                       | wetland complex with ephemeral to permanent ponds                       | 7 years                                    | egg mass counts for focal species                 |
| Petranka, J. W.; Kennedy, C. A.; Murray, S. S. Response of Amphibians to Restoration of a Southern Appalachian Wetland: A Long-Term Analysis of Community Dynamics. <i>Wetlands</i> <b>2003</b> , 23 (4), 1030–1042. | 107 | Tulula Wetlands Mitigation Bank, North Carolina, USA                                                                                       | wetland complex with ephemeral to permanent ponds                       | 7 years                                    | egg mass counts for focal species                 |
| Petranka, J. W.; Holbrook, C. T. Wetland Restoration for Amphibians: Should Local Sites Be Designed to Support Metapopulations or Patchy Populations? <i>Restor. Ecol.</i> <b>2006</b> , 14 (3), 404–411.            | 19  | Tulula Wetlands Mitigation Bank, North Carolina, USA                                                                                       | wetland complex with ephemeral to permanent ponds                       | 7 years                                    | egg mass counts for focal species                 |
| Rannap, R.; Lõhmus, A.; Briggs, L. Restoring Ponds for Amphibians: A Success Story. <i>Hydrobiologia</i> <b>2009</b> , 634 (1), 87–95.                                                                               | 52  | six protected areas, Estonia                                                                                                               | ephemeral to permanent natural and created ponds within protected areas | 3 years                                    | occupancy, species richness                       |
| Rothenberger, M. B., M. K. Vera, D. Germanoski, and E. Ramirez. 2019. Comparing amphibian habitat quality and functional success among natural, restored, and created vernal pools. <i>Restor. Ecol.</i> 27:881–891. | *   | Jacobsburg State Park; Merrill Creek Reservoir Environmental Preserve; Lee and Virginia Graver Arboretum; Hellertown Site, New Jersey, USA | vernal pools, forest and field uplands                                  | Merrill Creek - 28 years; Graver - unknown | reproductive success, metamorphs of focal species |
| Rothenberger, M. B.; Baranovic, A. Predator-Prey Relationships within Natural, Restored, and Created Vernal Pools. <i>Restor. Ecol.</i> <b>2021</b> , 29 (1): e13308.                                                | 12* | Jacobsburg State Park; Merrill Creek Reservoir Environmental Preserve; Lee and Virginia Graver Arboretum; Hellertown Site, New Jersey, USA | vernal pools, forest and field uplands                                  | Merrill Creek - 28 years; Graver - unknown | reproductive success, larval survival             |

|                                                                                                                                                                                                                                                                 |     |                                                        |                                                                                    |                   |                                           |
|-----------------------------------------------------------------------------------------------------------------------------------------------------------------------------------------------------------------------------------------------------------------|-----|--------------------------------------------------------|------------------------------------------------------------------------------------|-------------------|-------------------------------------------|
| Sacerdote, A. B. Reintroduction of Extirpated Flatwoods Amphibians into Restored Forested Wetlands in Northern Illinois: Feasibility Assessment, Implementation, Habitat Restoration and Conservation Implications, Northern Illinois University, <b>2009</b> . | 56  | MacArthur Woods Forest Preserve, Illinois, USA         | flatwoods ephemeral wetlands                                                       | 4 years           | species diversity                         |
| Sacerdote, A. B.; King, R. B. Dissolved Oxygen Requirements for Hatching Success of Two Ambystomatid Salamanders in Restored Ephemeral Ponds. <i>Wetlands</i> <b>2009</b> , 29 (4), 1202–1213.                                                                  | 57  | MacArthur Woods Forest Preserve, Illinois, USA         | flatwoods ephemeral wetlands                                                       | 4 years           | hatching success                          |
| Scott, D. E. Savannah River Ecological Laboratory, Aiken, SC. Personal Communication, February <b>2022</b> .                                                                                                                                                    | 65  | Savannah River Ecology Laboratory, South Carolina, USA | old borrow-pit turned ephemeral wetland                                            | 1 breeding season | successful development                    |
| Seigel, R. A.; Dinsmore, A.; Richter, S. C. Using Well Water to Increase Hydroperiod as a Management Option for Pond-Breeding Amphibians. <i>Wildl. Soc. Bull.</i> <b>2006</b> , 34 (4), 1022–1027.                                                             | 47  | Glen's Pond, Desoto National Forest, Mississippi, USA  | wetland, longleaf pine upland                                                      | 1 breeding season | reproductive success, metamorphs produced |
| Skelly, D. K.; Bolden, S. R.; Freidenburg, L. K. Experimental Canopy Removal Enhances Diversity of Vernal Pond Amphibians. <i>Ecol. Appl.</i> <b>2014</b> , 24 (2), 340–345.                                                                                    | 17  | Yale Myers Forest, Connecticut, USA                    | vernal pools                                                                       | 5 years           | species richness, reproductive effort     |
| Stevens, C. E.; Diamond, A. W.; Gabor Shane, T. S. Anuran Call Surveys on Small Wetlands in Prince Edward Island, Canada Restored by Dredging of Sediments. <i>Wetlands</i> <b>2002</b> , 22 (1), 90–99.                                                        | 58  | Prince Edward Island, Canada                           | small freshwater wetlands                                                          | 2 – 7 years       | abundance based on call surveys           |
| Stiles, R. M.; La Rue, C. H.; Hawkins, M. J.; Mitchell, W. A.; Lannoo, M. J. Amphibian Response to a Large-scale Habitat Restoration in the Prairie Pothole Region. <i>J. N. Am. Herpetol.</i> <b>2016</b> , 2016 (1), 70–79.                                   | 106 | Iowa, USA                                              | Prairie potholes                                                                   | 0 – ≥ 18 years    | occupancy of focal species                |
| Waddle, J. H.; Glorioso, B. M.; Faulkner, S. P. A Quantitative Assessment of the Conservation Benefits of the Wetlands Reserve Program to Amphibians. <i>Restor. Ecol.</i> <b>2013</b> , 21 (2), 200–206.                                                       | 88  | Mississippi, USA                                       | wetlands enrolled in WRP <sup>†</sup> , upland bottomland hardwood and agriculture | ≥ 6 years         | occupancy, species richness               |
| Walls, S. C.; Waddle, J. H.; Faulkner, S. P. Wetland Reserve Program Enhances Site Occupancy and Species Richness in Assemblages of Anuran Amphibians in the Mississippi Alluvial Valley, USA. <i>Wetlands</i> <b>2014</b> , 34 (1), 197–207.                   | 87  | Arkansas & Louisiana, USA                              | wetlands enrolled in WRP <sup>†</sup> , upland bottomland hardwood and agriculture | 3 – 12 years      | occupancy, species richness               |

|                                                                                                                                                                                   |   |                |                                           |              |                    |
|-----------------------------------------------------------------------------------------------------------------------------------------------------------------------------------|---|----------------|-------------------------------------------|--------------|--------------------|
| Zimmer, K. D.; Hanson, M. A.; Butler, M. G. Effects of fathead minnows and restoration on prairie wetland ecosystems. <i>Freshwater Biology</i> <b>2002</b> , 47 (11), 2071–2086. | * | Minnesota, USA | prairie potholes, uplands prairie grasses | 5 – 10 years | relative abundance |
|-----------------------------------------------------------------------------------------------------------------------------------------------------------------------------------|---|----------------|-------------------------------------------|--------------|--------------------|

<sup>†</sup> United States Department of Agriculture Wetlands Reserve Program
